# Supplementary material for: A Concise Synthesis of Pyrrole-Based Drug Candidates from α-Hydroxyketones, 3-Oxobutanenitrile, and Anilines
Source: MDPI journal article supplement (doi:10.3390/molecules28031265), 2023-01-28
Supplement: s1 [file s1]

Communication

# A Concise Synthesis of Pyrrole-Based Drug Candidates from $\alpha$ -Hydroxyketones, 3-Oxobutanenitrile, and Anilines

Mengxin Xia <sup>1</sup>, Mardi Santoso <sup>2,\*</sup>, Ziad Moussa <sup>3</sup> and Zaher M. A. Judeh <sup>1,\*</sup>

<sup>1</sup> School of Chemistry, Chemical Engineering and Biotechnology, Nanyang Technological University, 62 Nanyang Drive, N1.2-B1-14, Singapore 637459, Singapore

<sup>2</sup> Department of Chemistry, Faculty of Science, Institut Teknologi Sepuluh Nopember, Sukolilo, Surabaya 60111, Indonesia

<sup>3</sup> Department of Chemistry, College of Science, United Arab Emirates University, Al-Ain P.O. Box 15551, United Arab Emirates

\* Correspondence: tsv09@yahoo.com (M.S.); zaher@ntu.edu.sg (Z.M.A.J.); Tel.: +65-6790-6738 (Z.M.A.J.); Fax: +65-6794-7553 (Z.M.A.J.)

| Table of Contents:                                                                                                                | Page    |
|-----------------------------------------------------------------------------------------------------------------------------------|---------|
| 1. <sup>1</sup> H NMR and <sup>13</sup> C NMR spectra of pyrroles <b>1a</b> , <b>9</b> , <b>10</b> , <b>15–18</b> , and <b>2a</b> | S2–S17  |
| 2. Single-crystal XRD of pyrrole <b>2a</b>                                                                                        | S18–S19 |

## 1.1. H NMR and <sup>13</sup>C NMR spectra

1-(4-Fluorophenyl)-2-methyl-5-(4-(methylsulfonyl)phenyl)-1*H*-pyrrole-3-carbonitrile **1a**

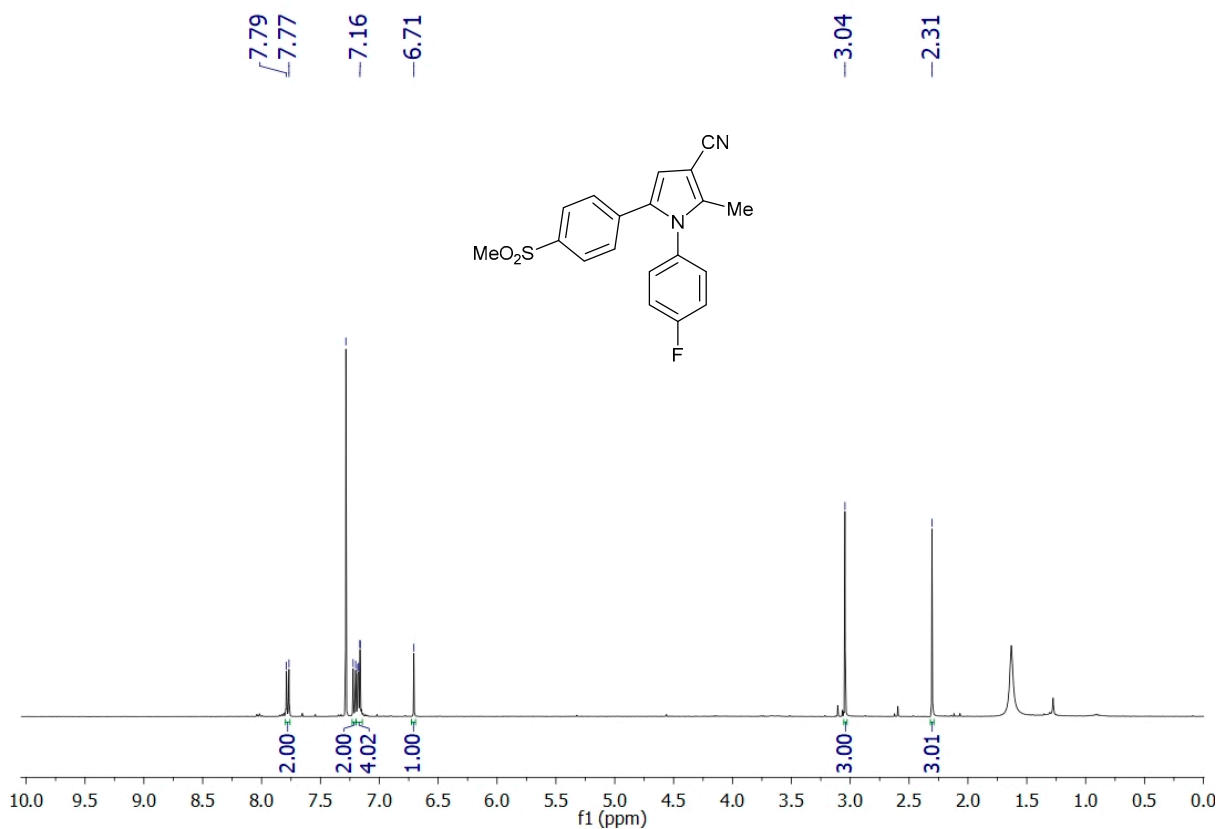

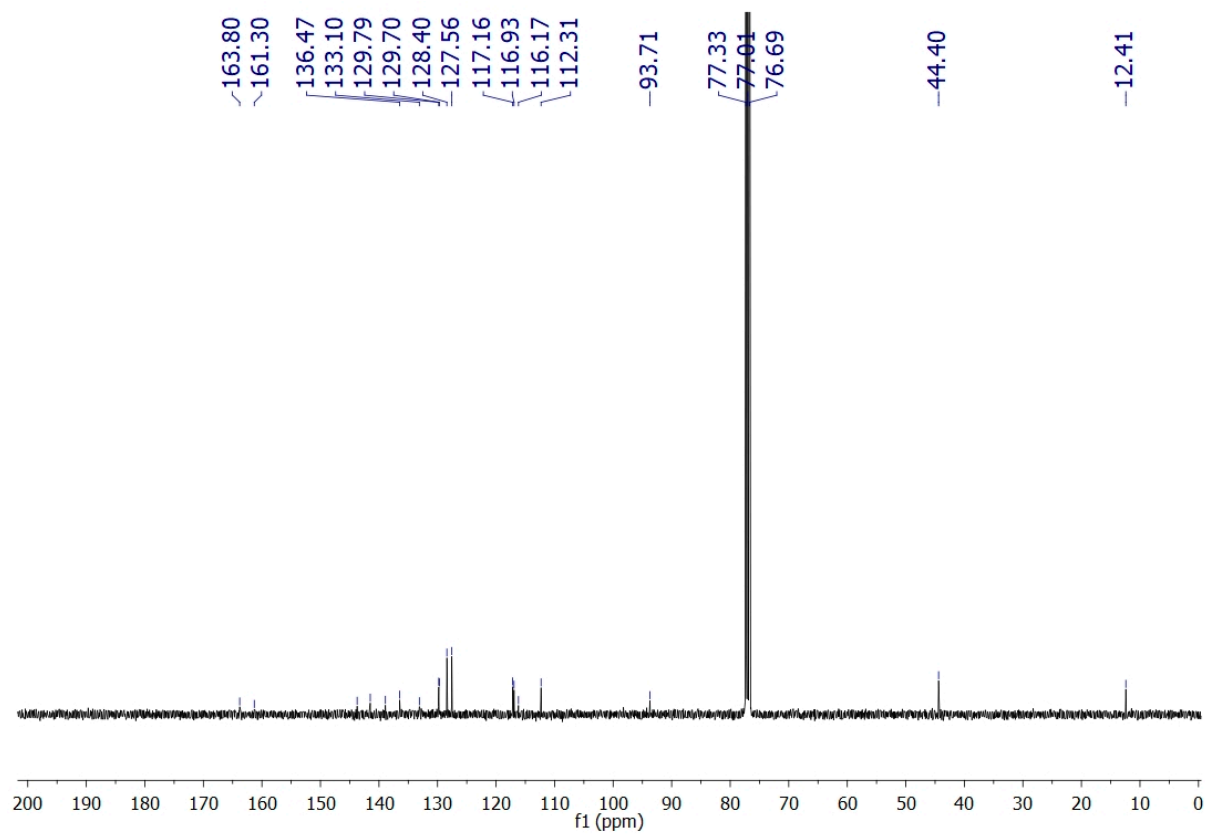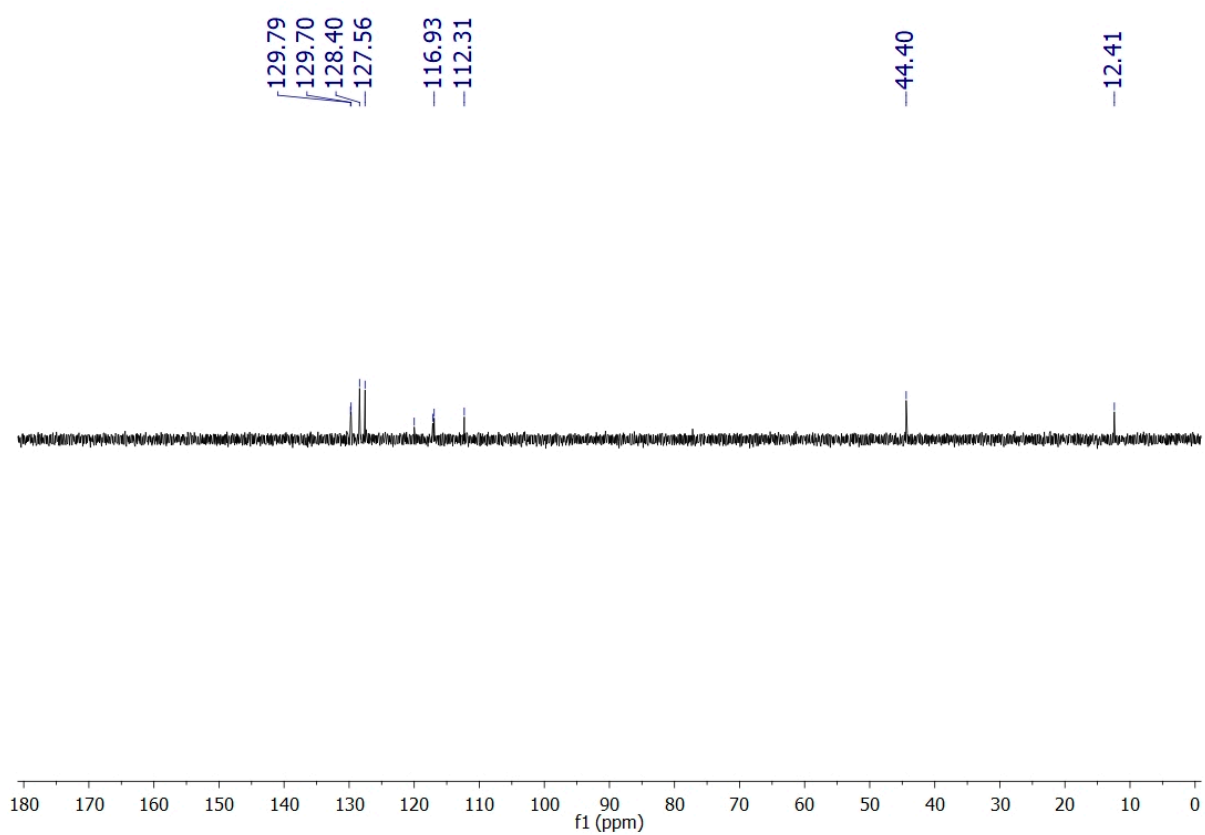

## 2-Methyl-5-(4-(methylsulfonyl)phenyl)-1-phenethyl-1H-pyrrole-3-carbonitrile 9

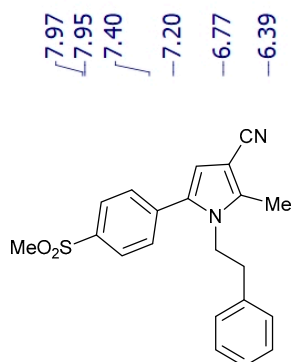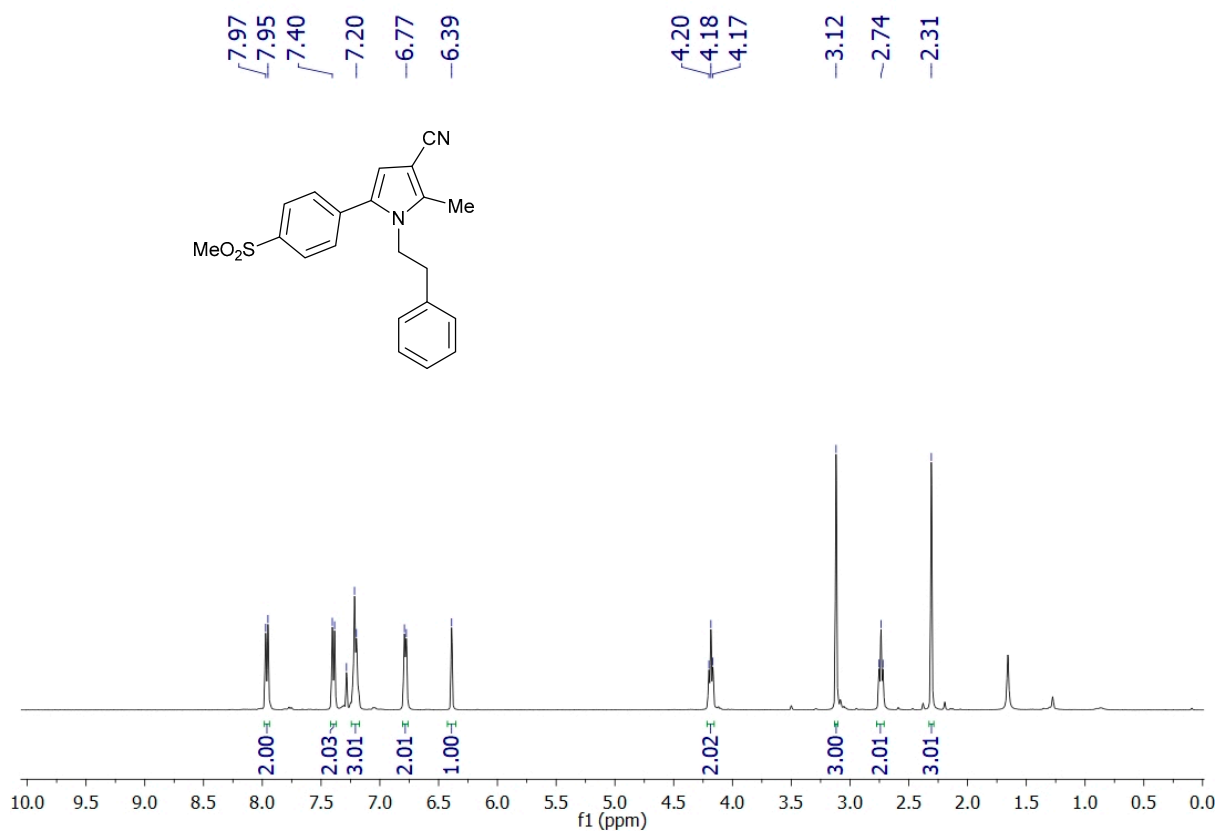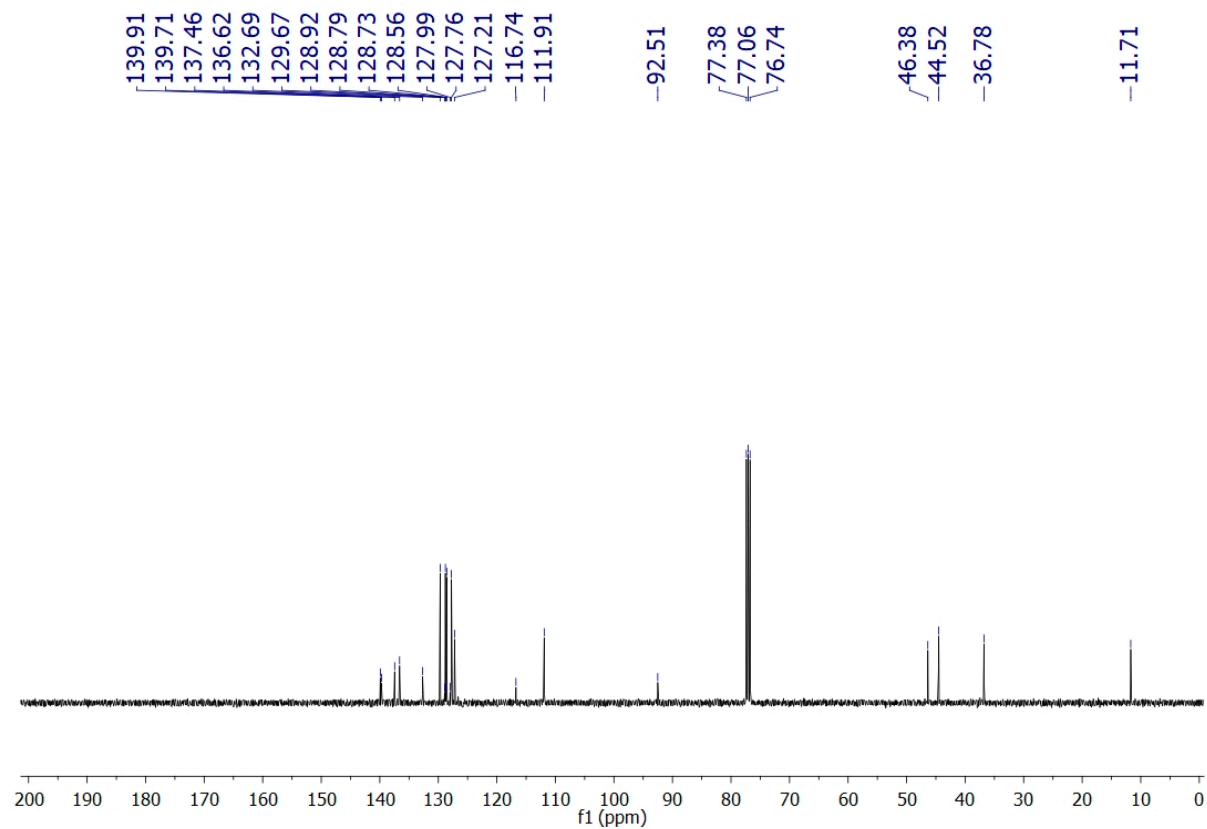

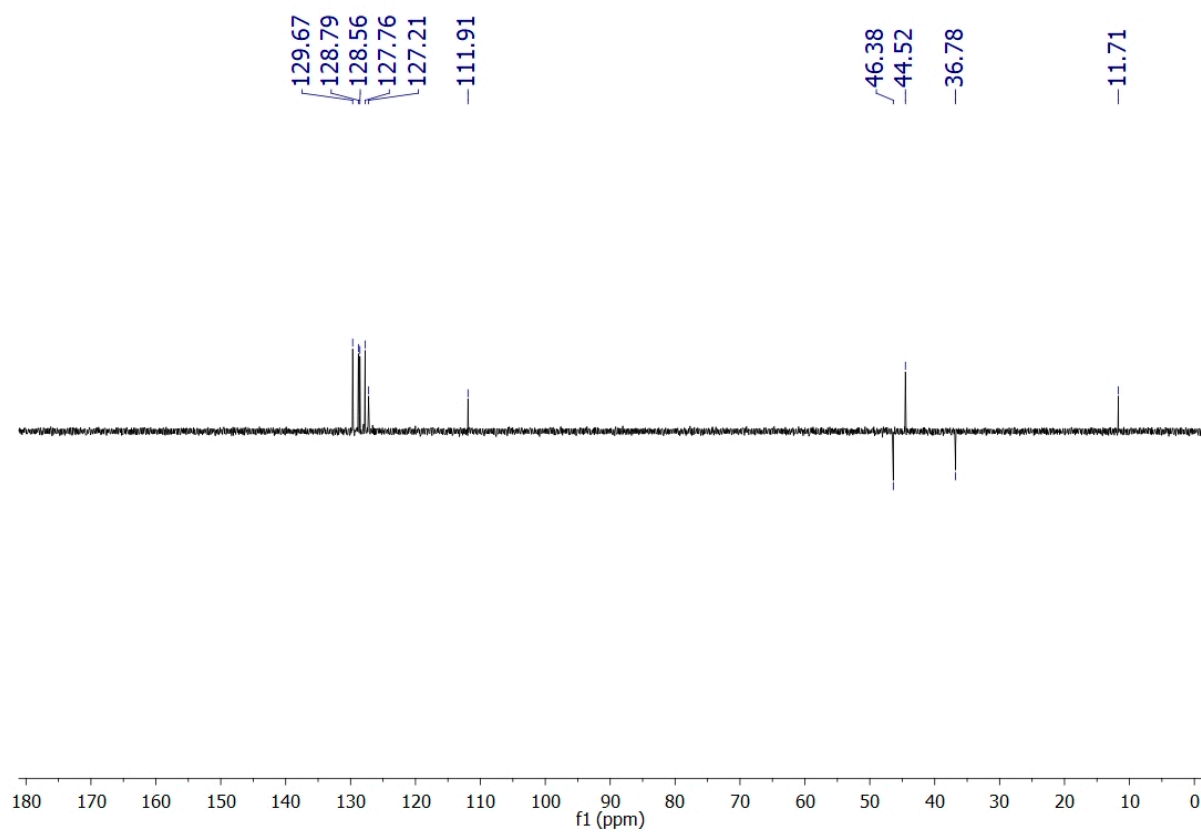

1-Benzyl-5-(4-(methylsulfonyl)phenyl)-2-phenyl-1*H*-pyrrole-3-carbonitrile **10**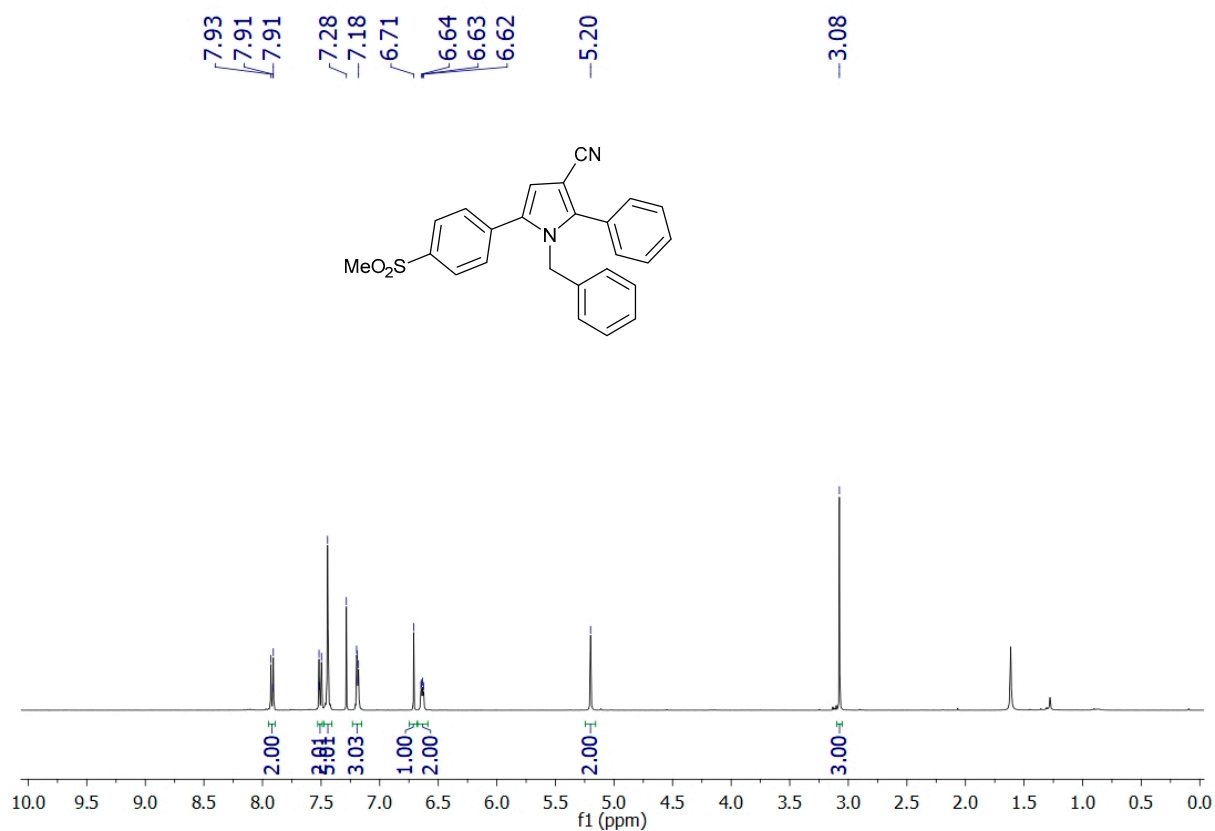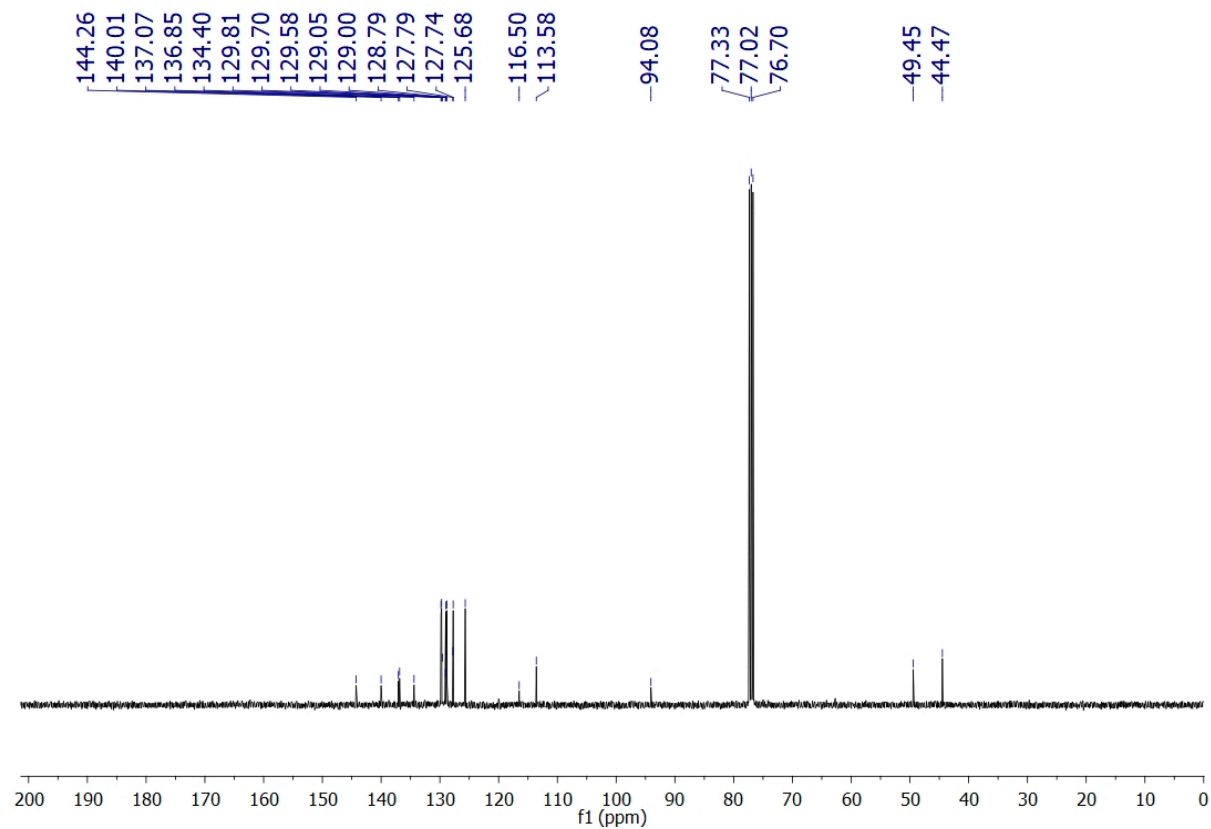

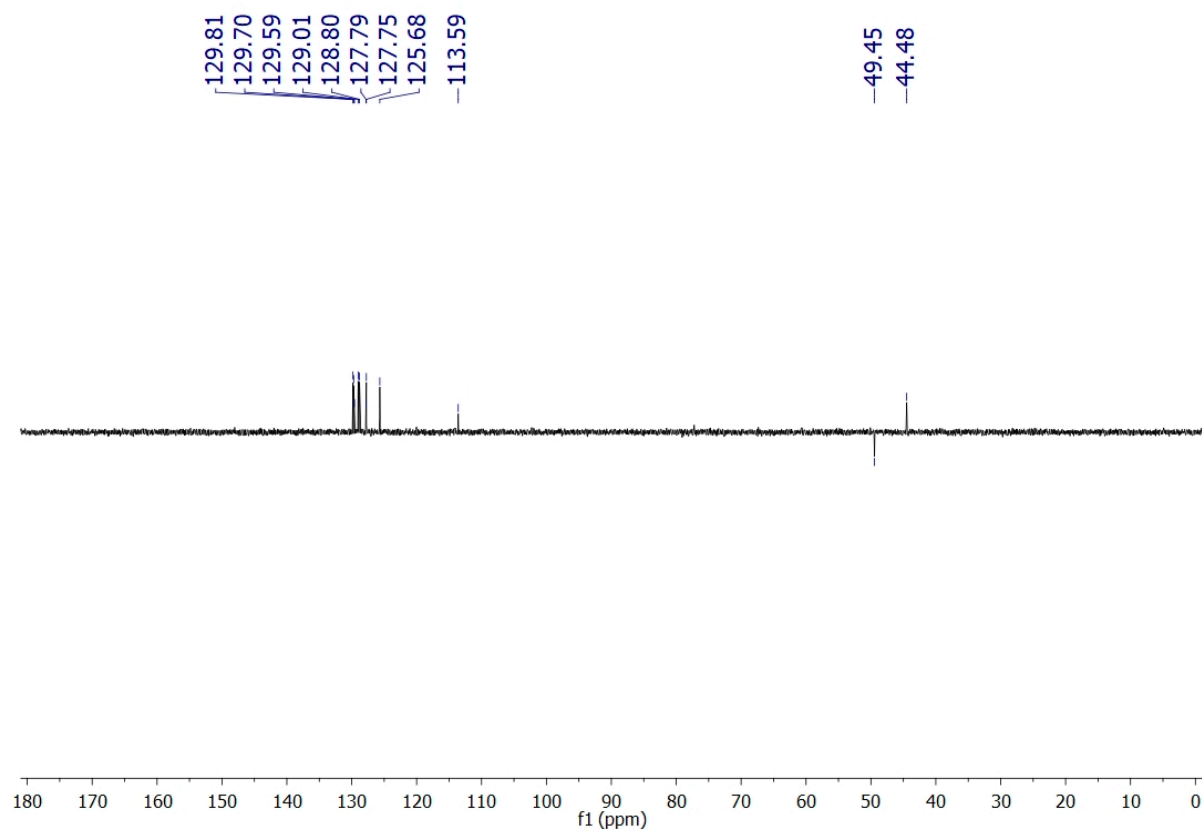

1,5-Bis(4-chlorophenyl)-2-methyl-1H-pyrrole-3-carbonitrile **15**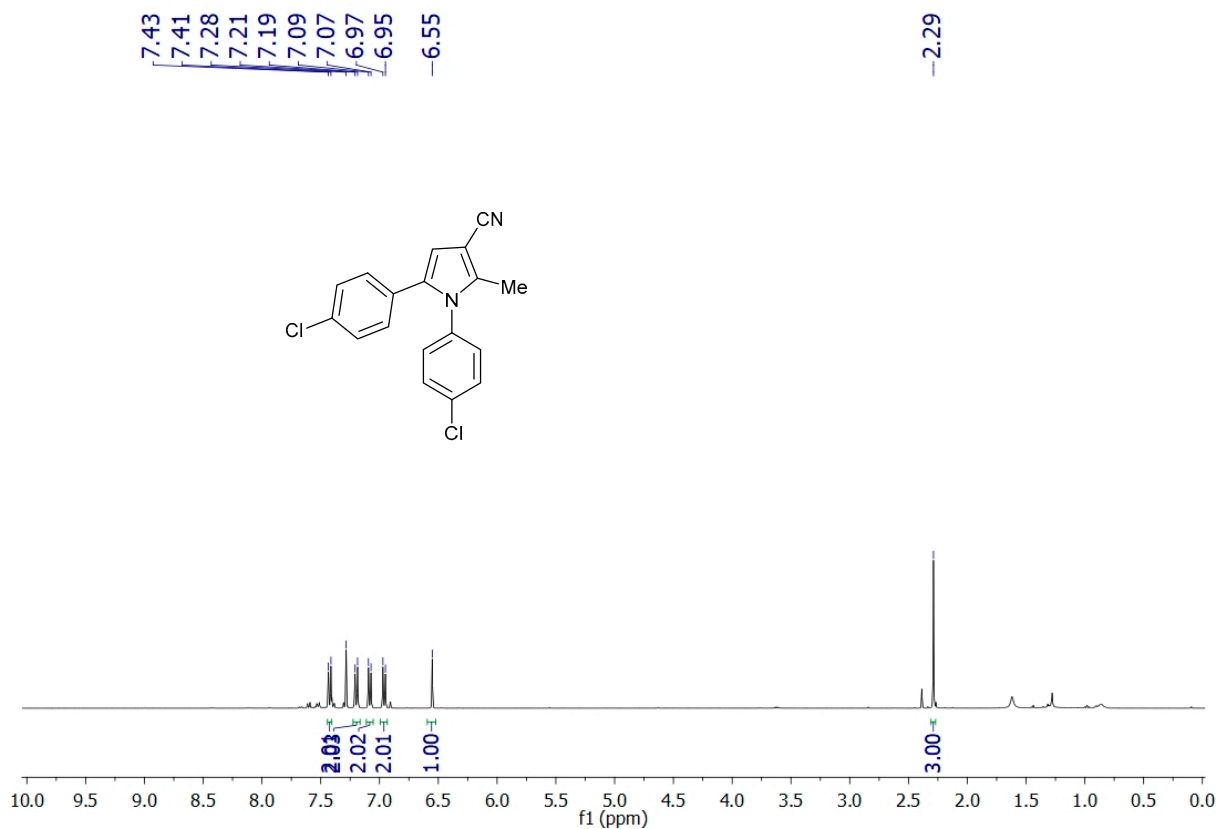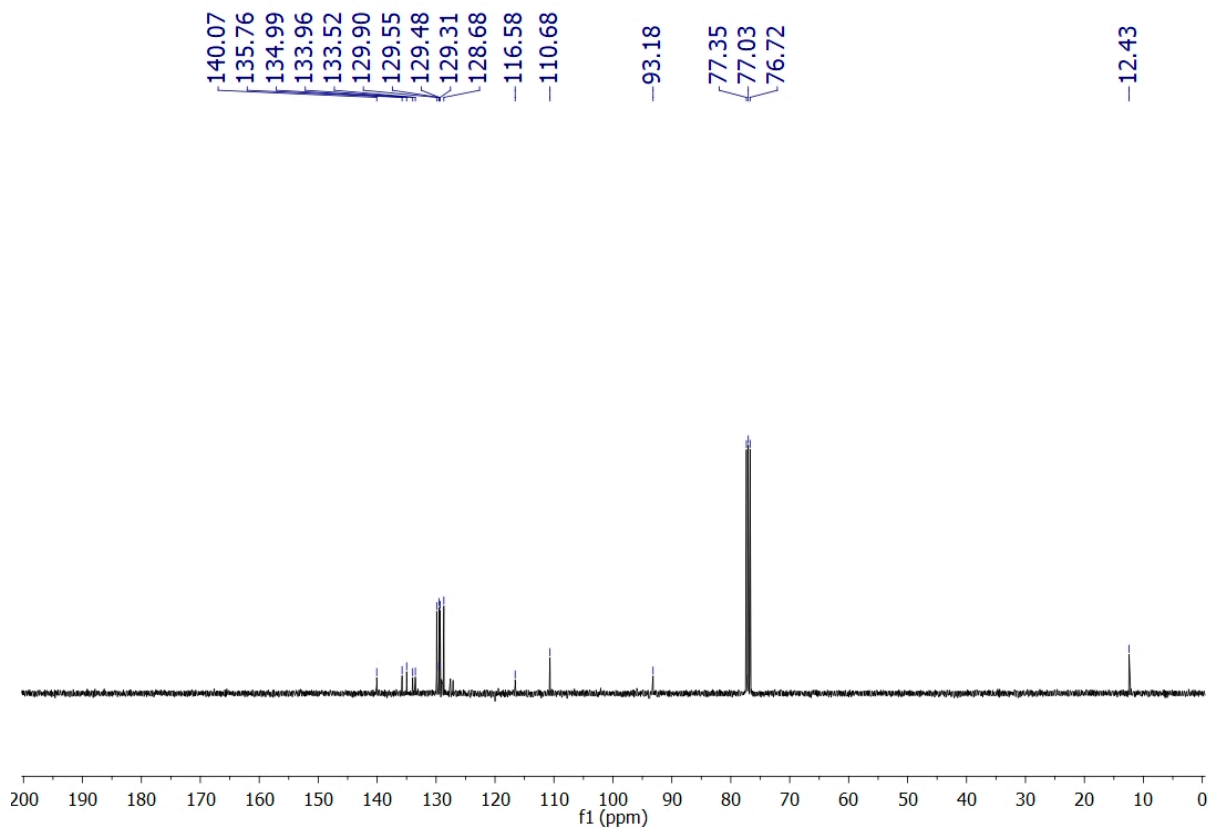

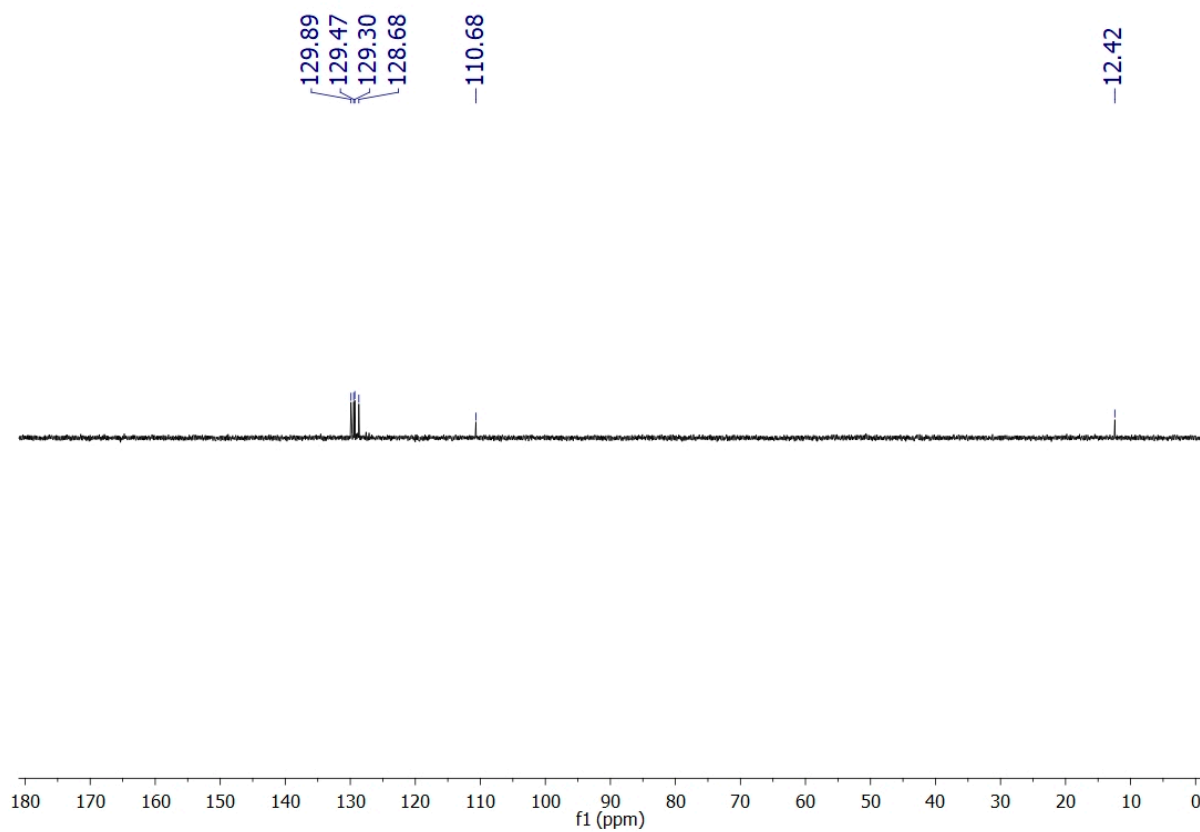1-(4-Fluorophenyl)-2-methyl-5-(p-tolyl)-1H-pyrrole-3-carbonitrile **16**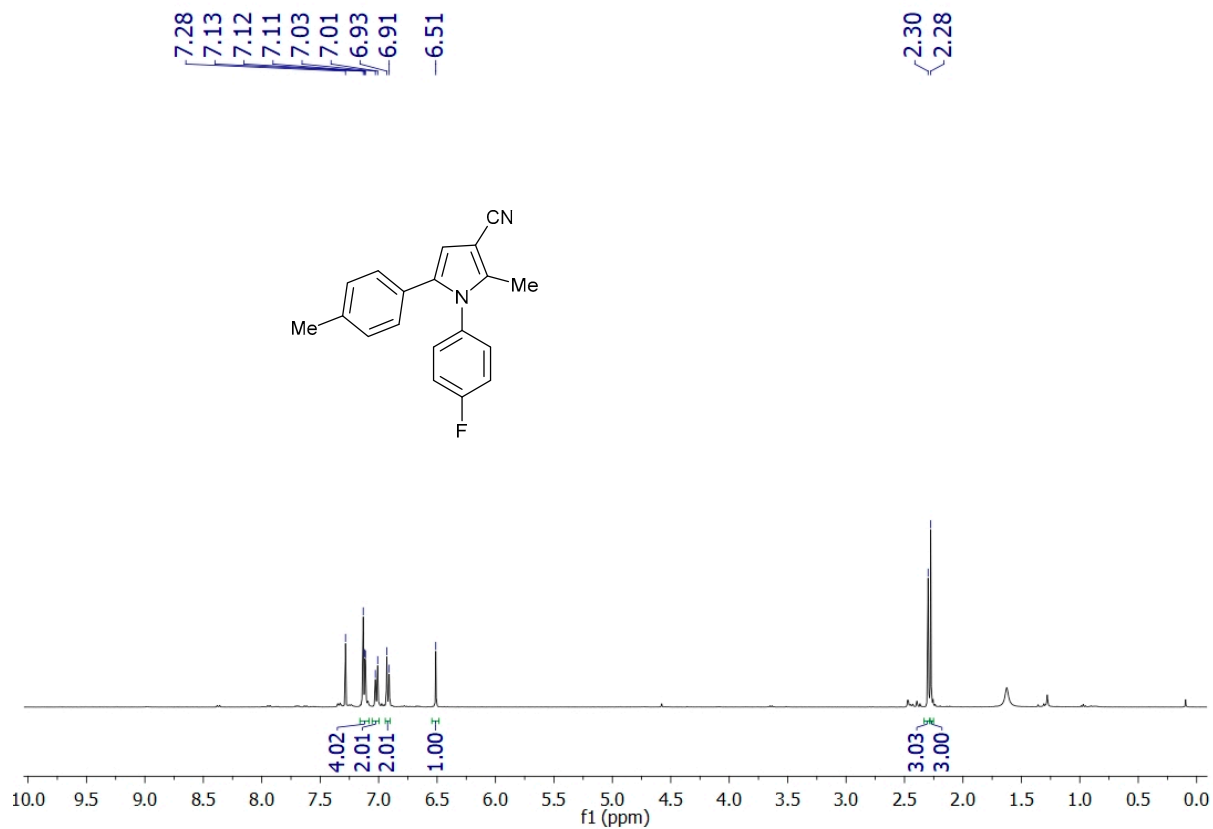



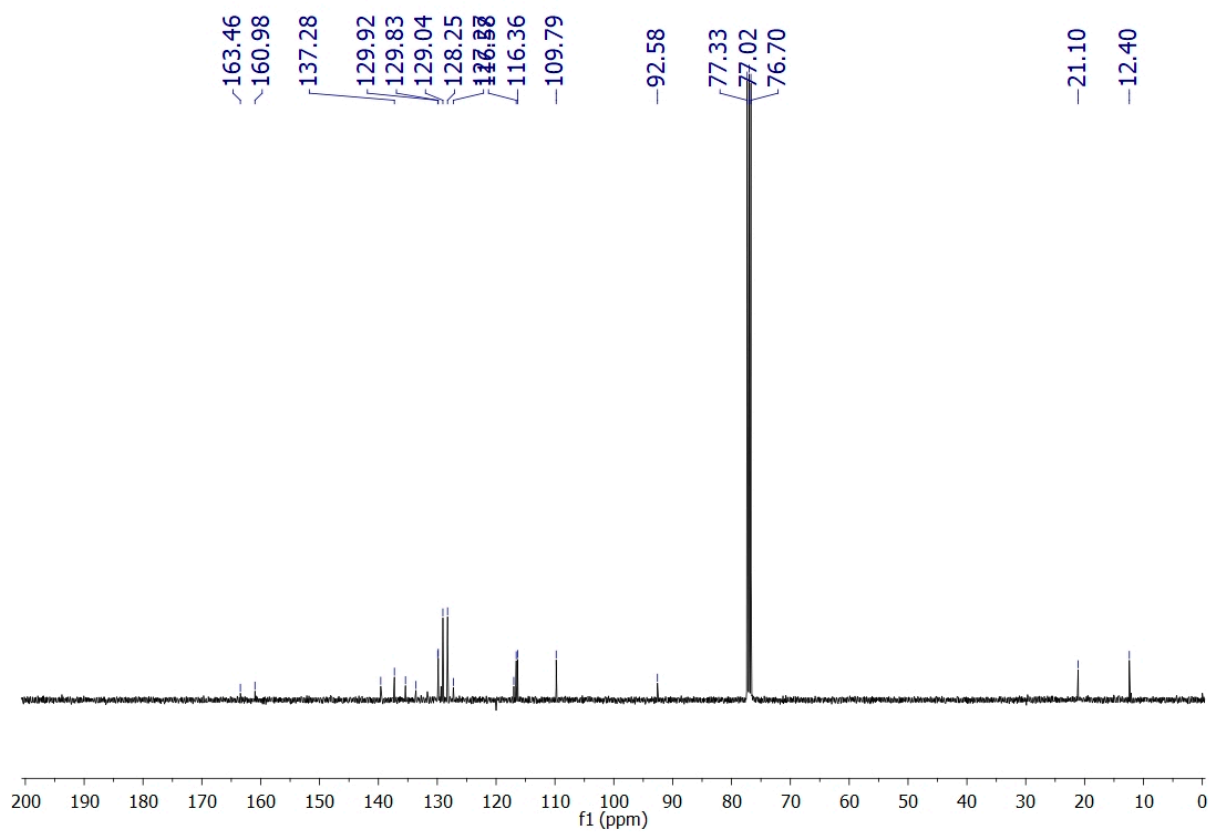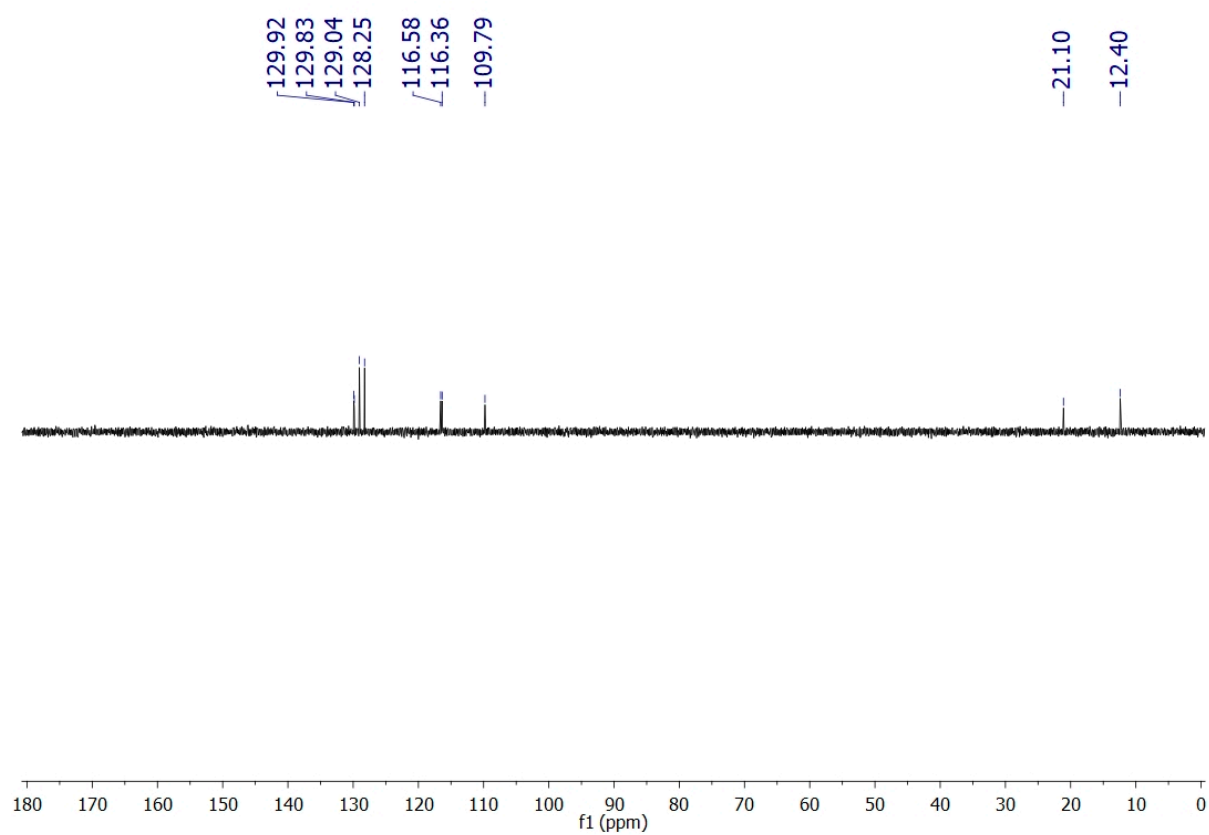

1-(4-Fluorophenyl)-5-(4-methoxyphenyl)-2-methyl-1*H*-pyrrole-3-carbonitrile **17**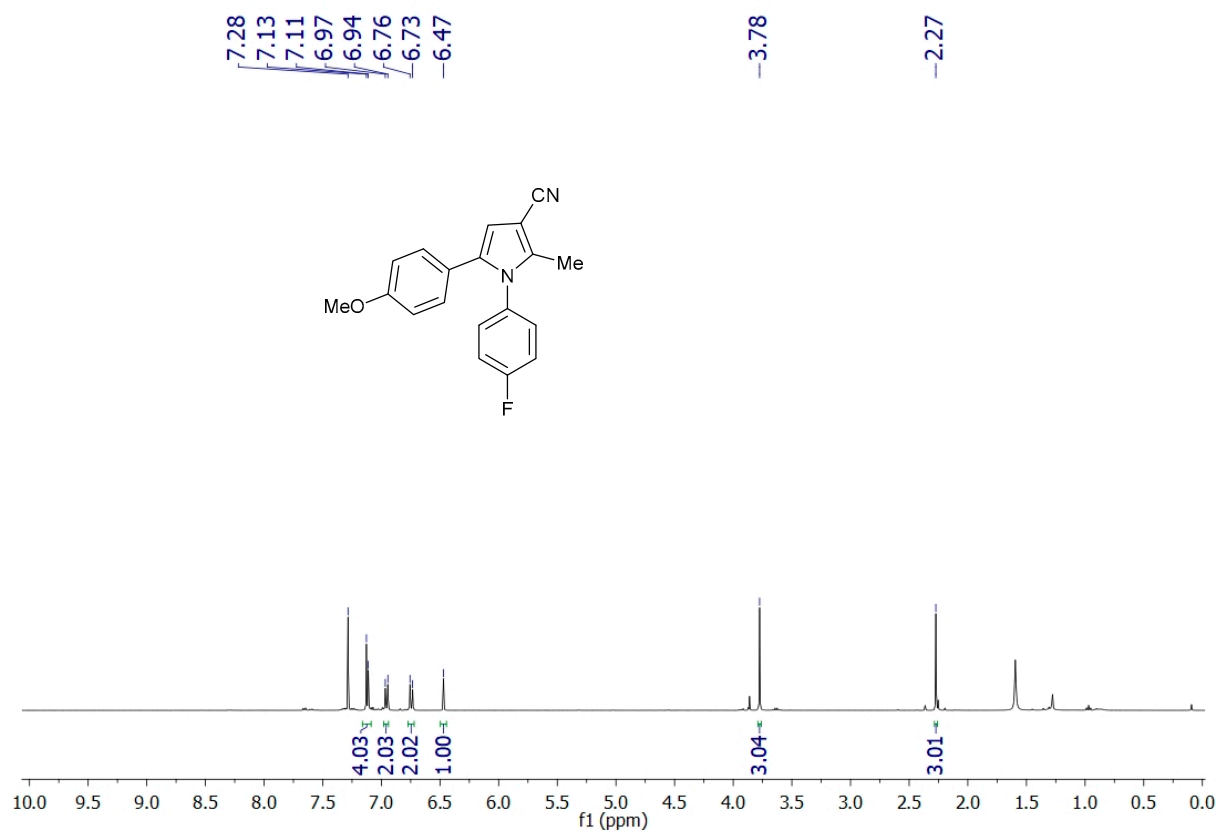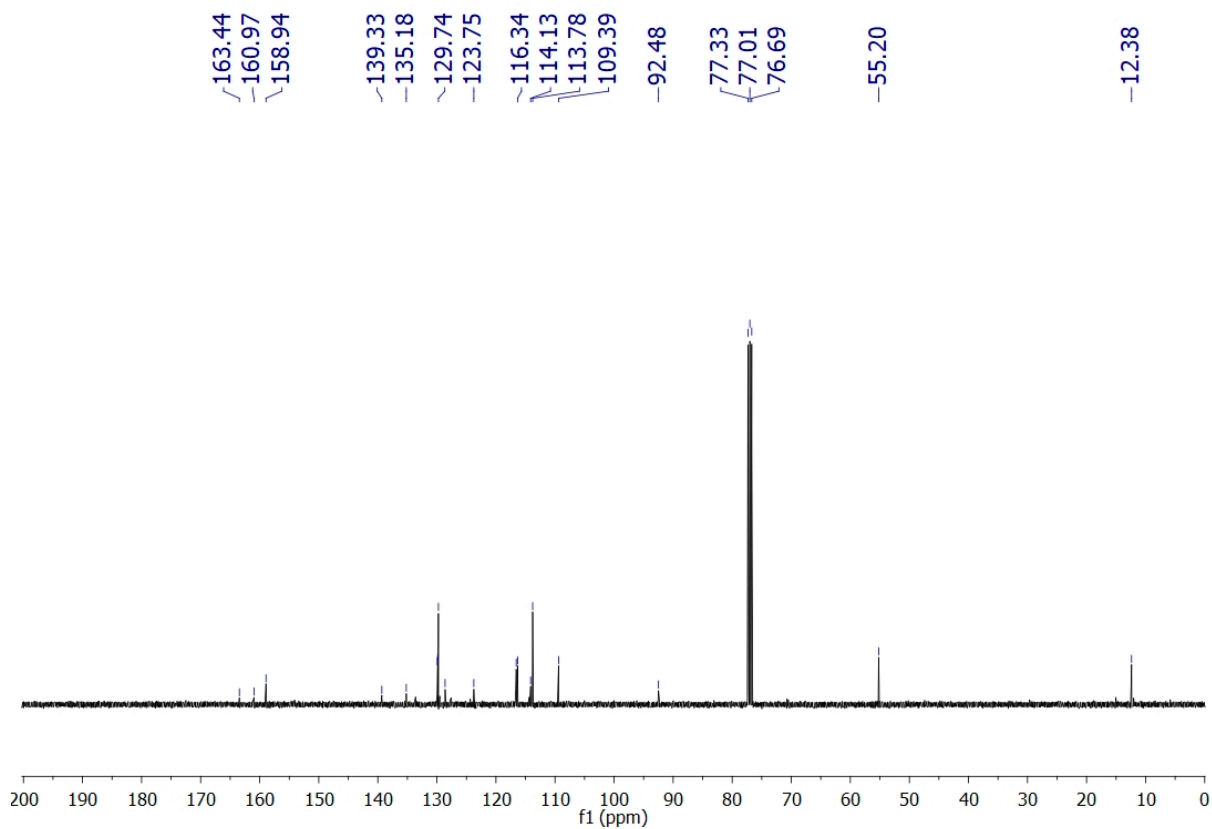

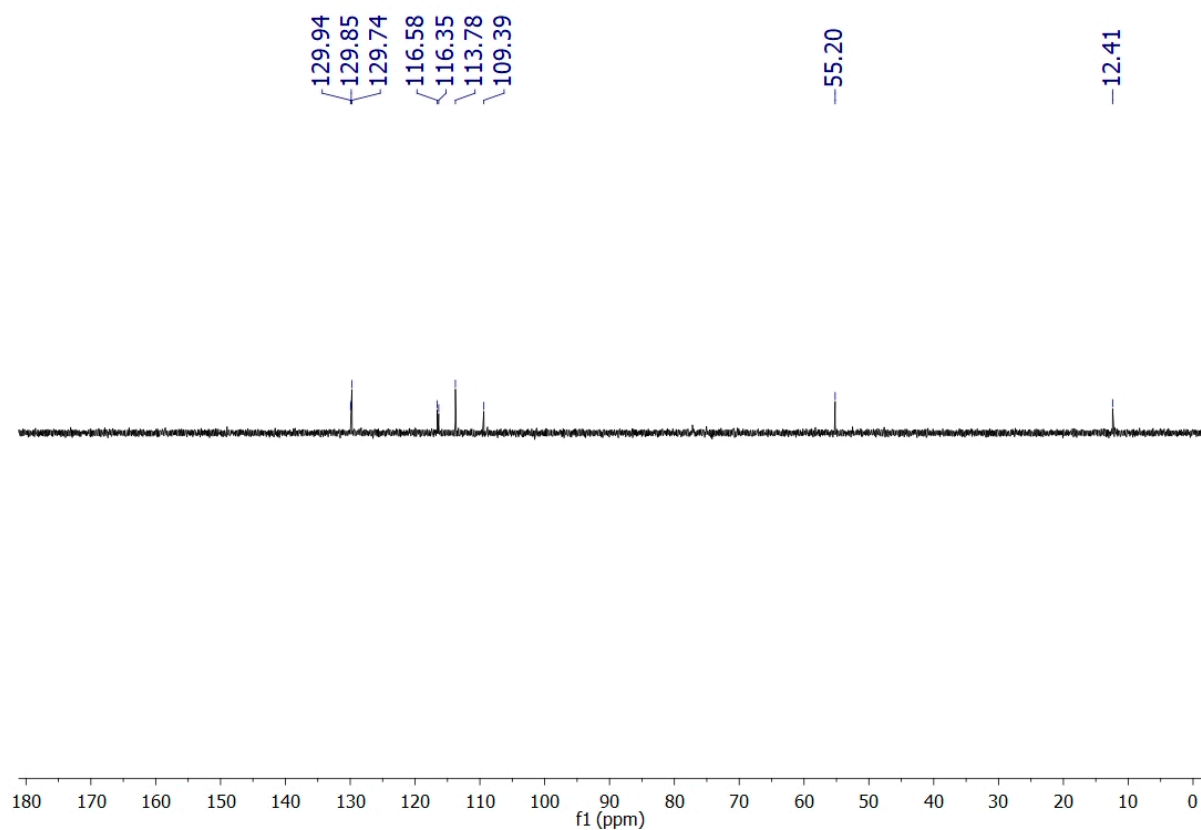1,5-Bis(4-chlorophenyl)-2-methyl-1H-pyrrole-3-carbaldehyde **18**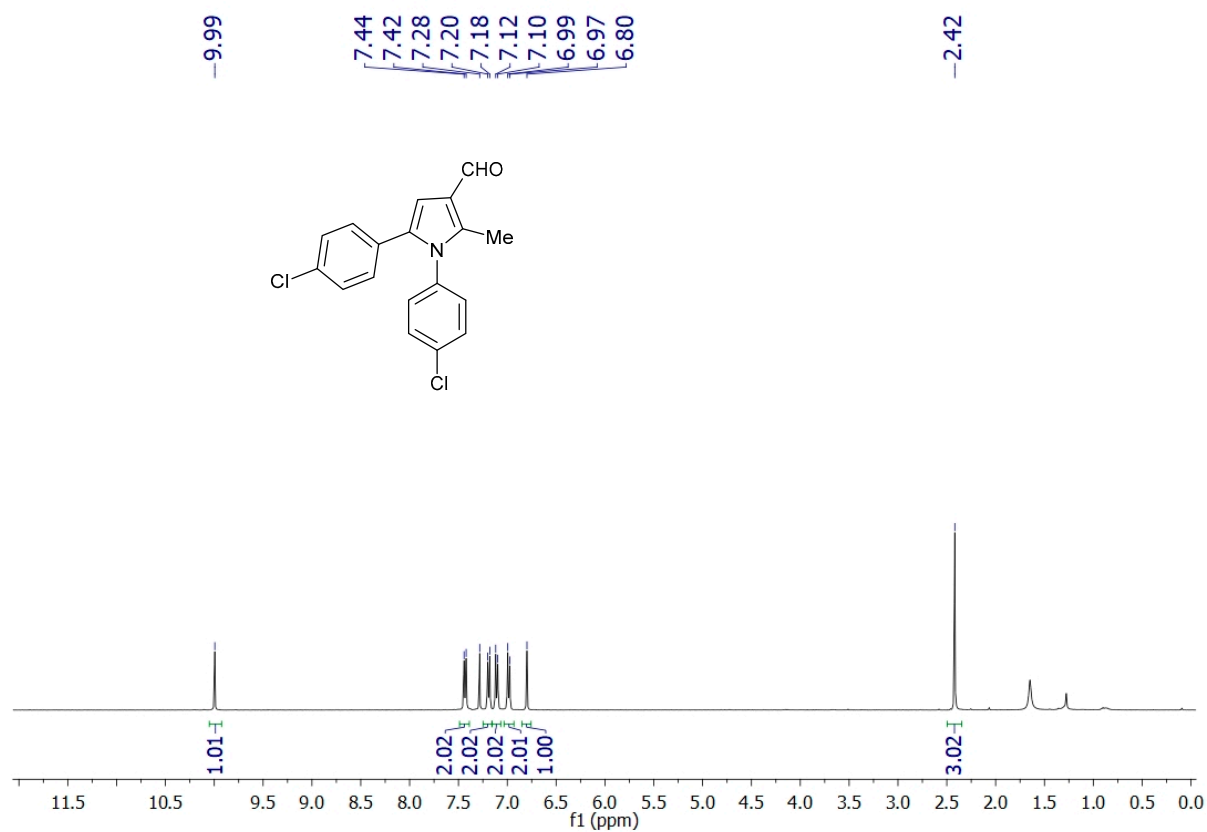

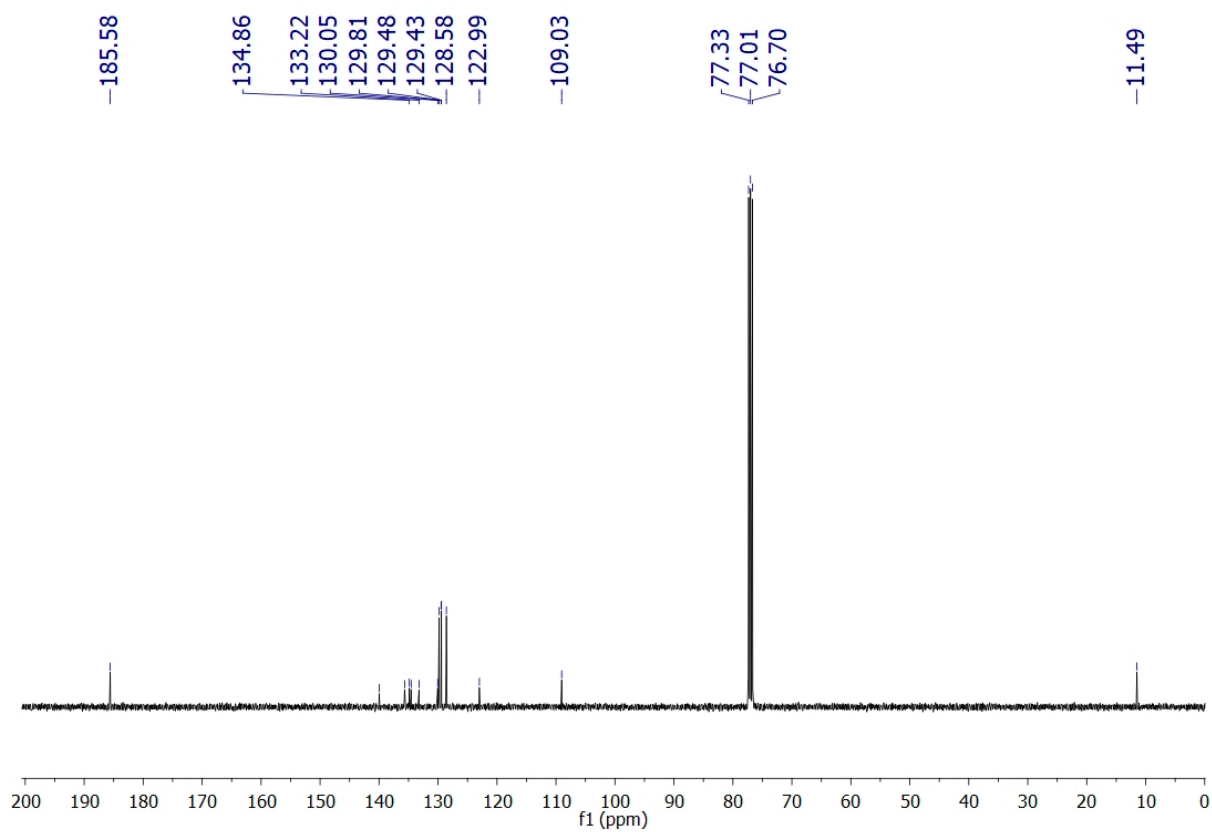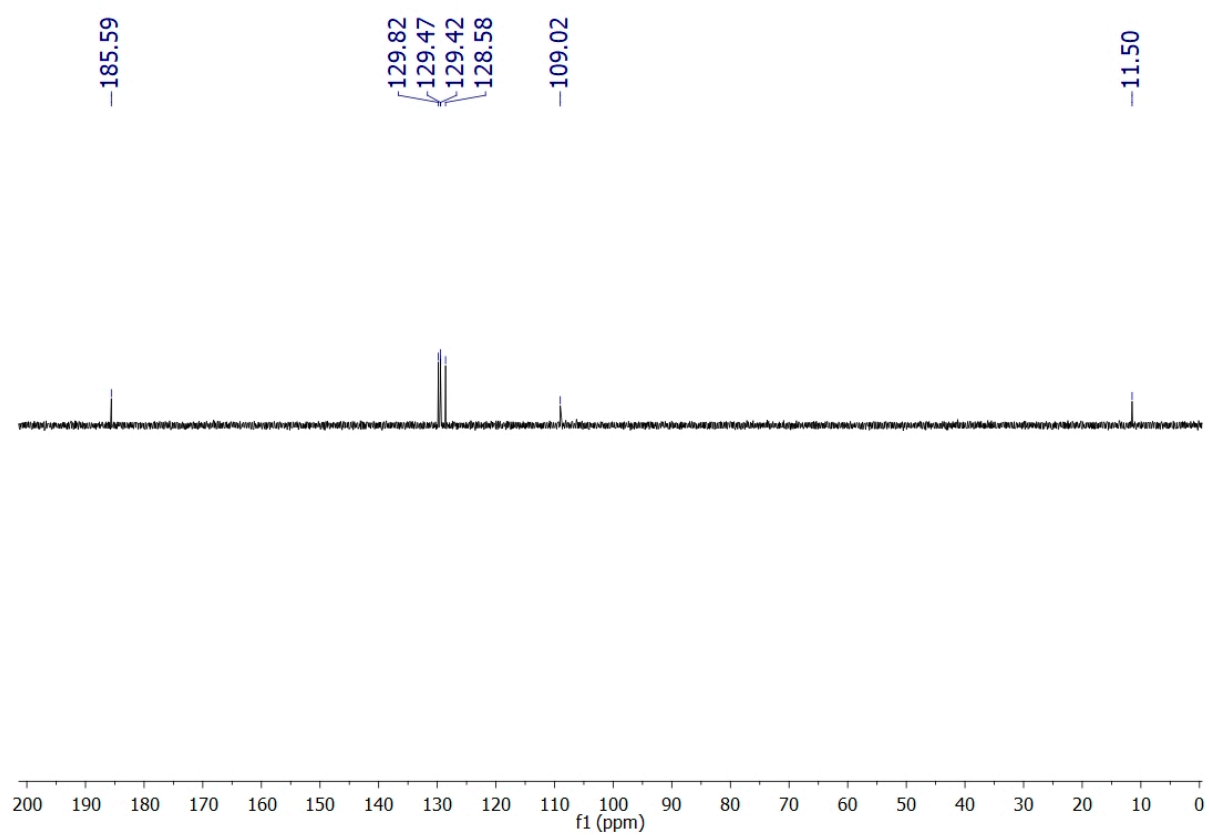

1-((1,5-Bis(4-chlorophenyl)-2-methyl-1H-pyrrol-3-yl)methyl)-4-methylpiperazine **2a**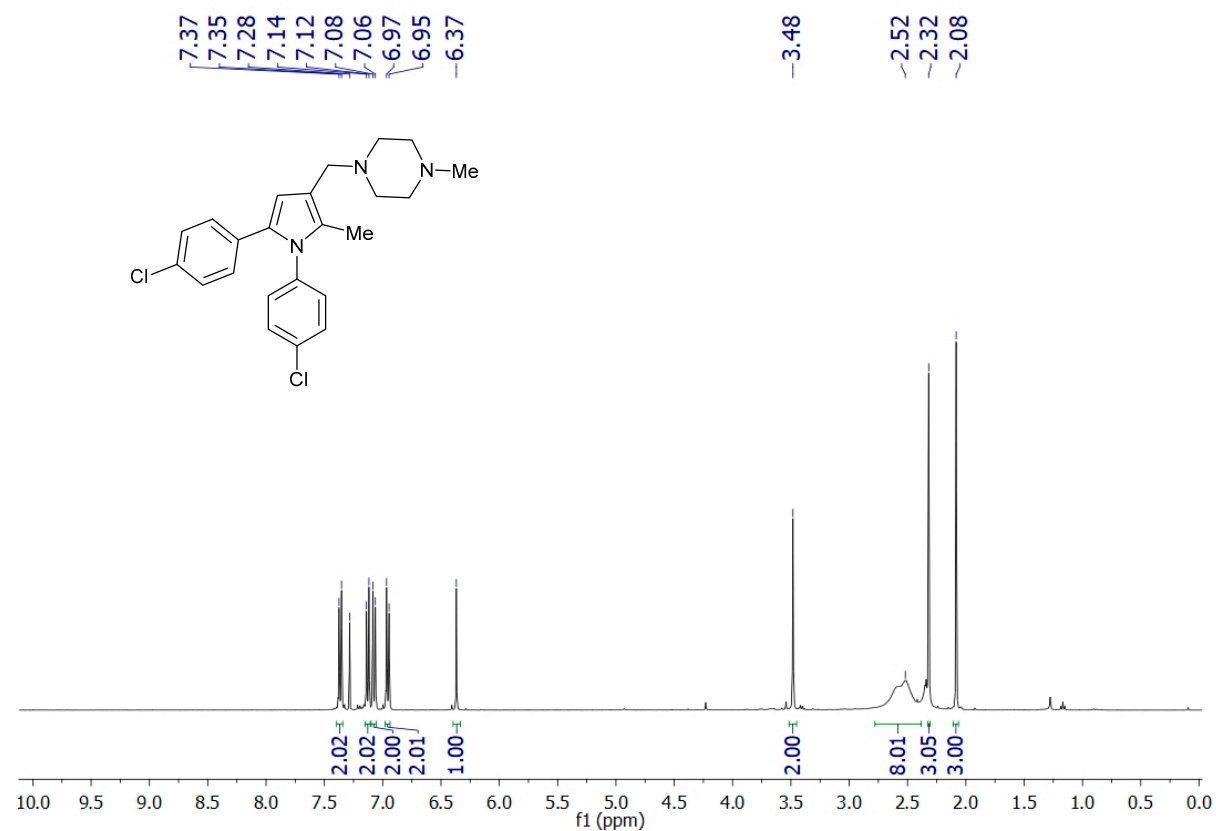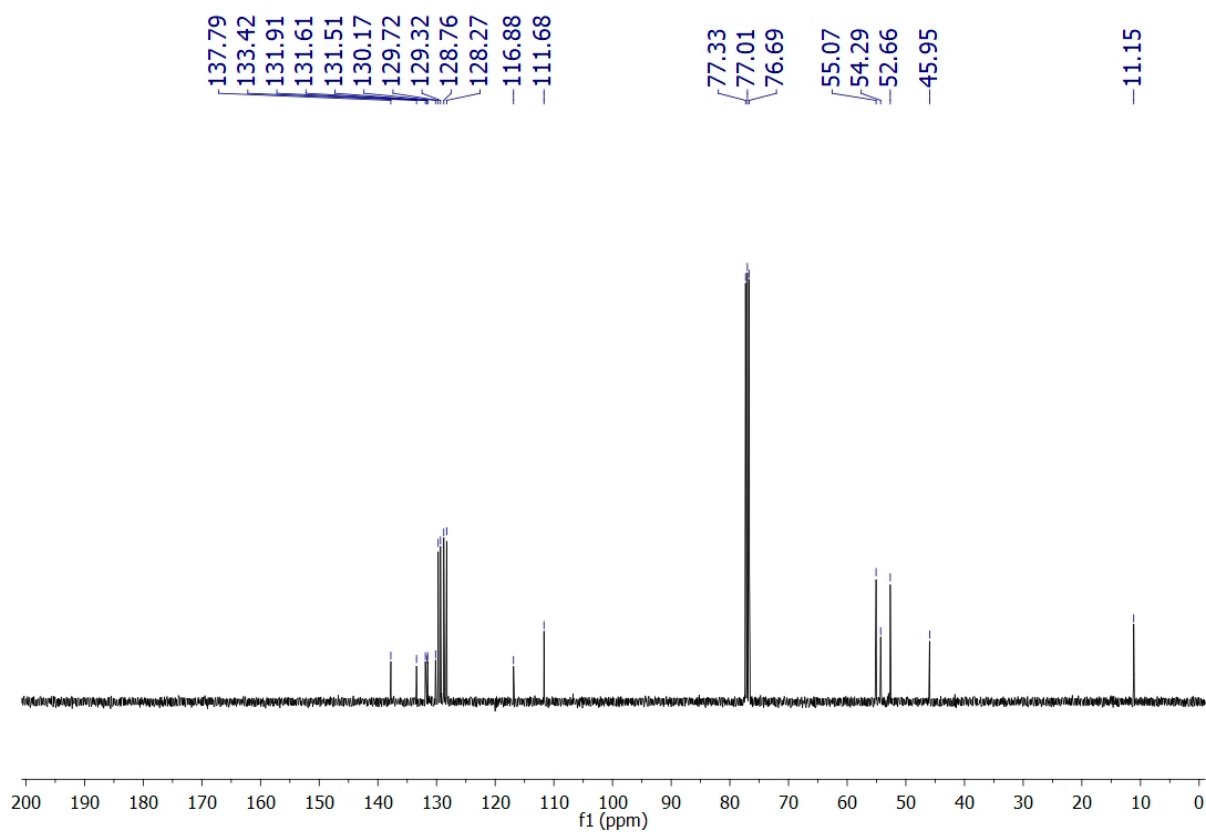

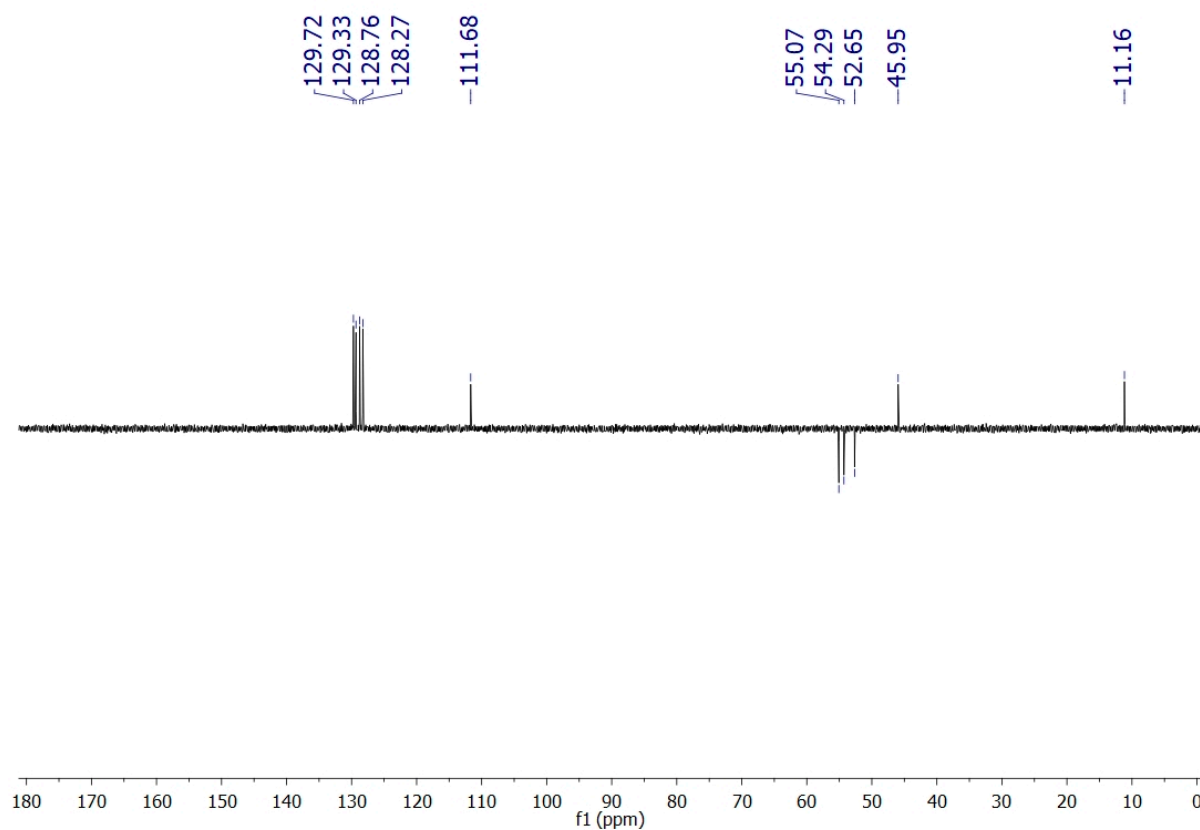

## 2. Single-crystal XRD of BM212 (product 2a)

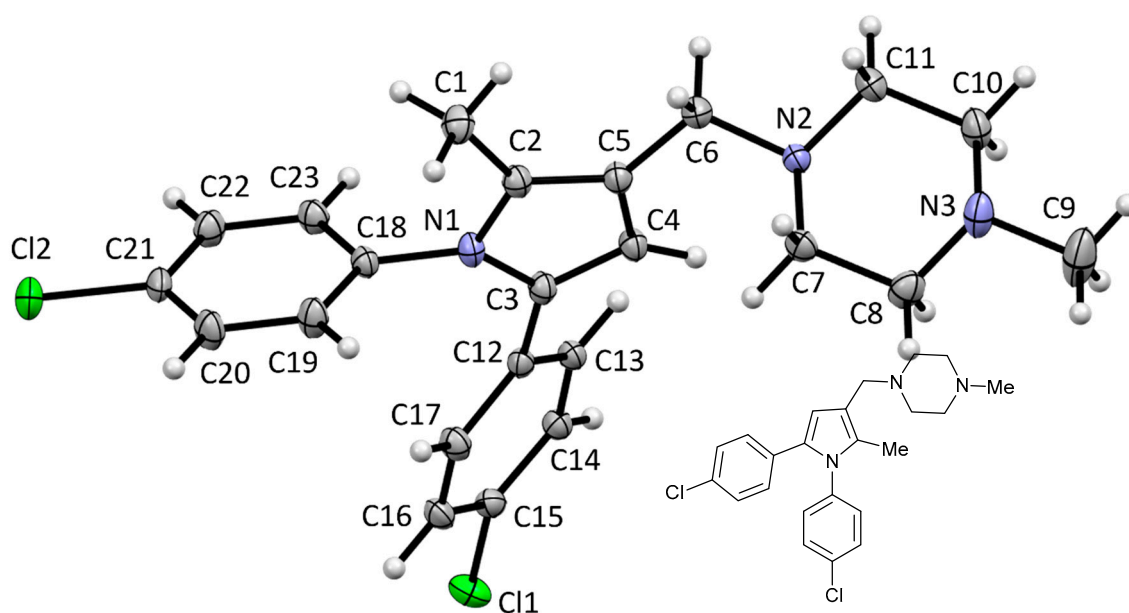

**Figure S1.** X-ray single crystal structure of BM212 2a (CCDC 2191163) (displacement ellipsoids are drawn at the 50% probability level).

**Table S1.** Crystal data and structure refinement for product **2a** (CCDC 2191163).

|                                   |                                                            |                                                          |
|-----------------------------------|------------------------------------------------------------|----------------------------------------------------------|
| Empirical formula                 | $C_{23}H_{25}Cl_2N_3$                                      |                                                          |
| Formula weight                    | 414.36                                                     |                                                          |
| Temperature                       | 100(2) K                                                   |                                                          |
| Crystal system                    | Triclinic                                                  |                                                          |
| Space group                       | P-1                                                        |                                                          |
| Unit cell dimensions              | a = 9.1454(10) Å<br>b = 11.1138(12) Å<br>c = 11.2090(12) Å | a = 100.119(4)°.<br>b = 100.255(4)°.<br>g = 106.088(4)°. |
| Volume                            | 1046.2(5) Å <sup>3</sup>                                   |                                                          |
| Z                                 | 2                                                          |                                                          |
| Density (calculated)              | 1.315 Mg/m <sup>3</sup>                                    |                                                          |
| F(000)                            | 436                                                        |                                                          |
| Reflections collected             | 26513                                                      |                                                          |
| Independent reflections           | 8999 [R(int) = 0.0570]                                     |                                                          |
| Max. and min. transmission        | 0.9150 and 0.9030                                          |                                                          |
| Goodness-of-fit on F <sup>2</sup> | 1.025                                                      |                                                          |
| Final R indices [I > 2σ(I)]       | R1 = 0.0533, wR2 = 0.1200                                  |                                                          |
| R indices (all data)              | R1 = 0.0892, wR2 = 0.1380                                  |                                                          |
